# Supplementary material for: Novel PDMS-b-PPO Membranes Modified with Graphene Oxide for Efficient Pervaporation Ethanol Dehydration
Source: MDPI journal article supplement (doi:10.3390/membranes12090832), 2022-08-25
Supplement: s1 [file s1]

## SUPPLEMENTARY MATERIALS

**Table S1.** Transport parameters (permeation flux, water content in the permeate, component (water and ethanol) permeability, separation factor ( $\beta$ ), membrane selectivity ( $\alpha$ ), and pervaporation separation index (PSI)) for the PPO and BCP-based membranes in pervaporation dehydration of ethanol (4.4-70 wt.% water) at 22°C.

| Transport parameter                       | Membrane<br>Water content<br>in feed, wt. % | PPO   | BCP<br>(PDMS:PPO:TDI<br>26:73:1) | BCP<br>(PDMS:PPO:TDI<br>41:58:1) | BCP<br>(PDMS:PPO:TDI<br>51:48:1) |
|-------------------------------------------|---------------------------------------------|-------|----------------------------------|----------------------------------|----------------------------------|
| Permeation flux,<br>kg/(m <sup>2</sup> h) | 4.4                                         | 0.023 | 0.033                            | 0.045                            | 0.155                            |
|                                           | 10                                          | 0.031 | 0.036                            | 0.046                            | 0.154                            |
|                                           | 30                                          | 0.038 | 0.040                            | 0.050                            | 0.151                            |
|                                           | 50                                          | 0.048 | 0.050                            | 0.058                            | 0.156                            |
|                                           | 70                                          | 0.050 | 0.052                            | 0.059                            | 0.155                            |
| Water content in<br>permeate, wt. %       | 4.4                                         | 100   | 77.0                             | 74.6                             | 43.5                             |
|                                           | 10                                          | 99.7  | 81.7                             | 77.6                             | 43.5                             |
|                                           | 30                                          | 98.6  | 86.1                             | 85.1                             | 59.7                             |
|                                           | 50                                          | 99.8  | 90.1                             | 89.7                             | 66.5                             |
|                                           | 70                                          | 98.9  | 98.4                             | 96.4                             | 87.3                             |

**Continuation of Table S1.** Transport parameters (permeation flux, water content in the permeate, component (water and ethanol) permeability, separation factor ( $\beta$ ), membrane selectivity ( $\alpha$ ), and pervaporation separation index (PSI)) for the PPO and BCP-based membranes in pervaporation dehydration of ethanol (4.4-70 wt.% water) at 22°C.

| Transport parameter | Membrane<br>Water content | PPO | BCP<br>(PDMS:PPO:TDI<br>26:73:1) | BCP<br>(PDMS:PPO:TDI<br>41:58:1) | BCP<br>(PDMS:PPO:TDI<br>51:48:1) |
|---------------------|---------------------------|-----|----------------------------------|----------------------------------|----------------------------------|
|---------------------|---------------------------|-----|----------------------------------|----------------------------------|----------------------------------|

|                                      | in feed, wt. % |                   |       |       |        |
|--------------------------------------|----------------|-------------------|-------|-------|--------|
| Water permeability,<br>Barrer        | 4.4            | 5451              | 59854 | 78639 | 158384 |
|                                      | 10             | 35219             | 33235 | 40448 | 76795  |
|                                      | 30             | 19202             | 17452 | 22006 | 45940  |
|                                      | 50             | 19255             | 18175 | 21167 | 42610  |
|                                      | 70             | 19453             | 19953 | 22286 | 53242  |
| Ethanol permeability,<br>Barrer      | 4.4            | $2 \cdot 10^{-7}$ | 815   | 1217  | 9260   |
|                                      | 10             | 13                | 799   | 1250  | 10655  |
|                                      | 30             | 119               | 1209  | 1651  | 13264  |
|                                      | 50             | 31                | 1995  | 2428  | 16422  |
|                                      | 70             | 513               | 779   | 1932  | 15030  |
| Separation factor<br>( $\beta$ )     | 4.4            | $2 \cdot 10^{11}$ | 73    | 64    | 17     |
|                                      | 10             | 2718              | 40    | 31    | 7      |
|                                      | 30             | 161               | 14    | 13    | 3      |
|                                      | 50             | 624               | 9     | 9     | 2      |
|                                      | 70             | 38                | 26    | 12    | 3      |
| Membrane selectivity<br>( $\alpha$ ) | 4.4            | $2 \cdot 10^{11}$ | 73    | 65    | 17     |
|                                      | 10             | 2817              | 42    | 32    | 7      |
|                                      | 30             | 161               | 14    | 13    | 3      |
|                                      | 50             | 625               | 9     | 9     | 2      |
|                                      | 70             | 38                | 26    | 12    | 3      |

**Continuation of Table S1.** Transport parameters (permeation flux, water content in the permeate, component (water and ethanol) permeability, separation factor ( $\beta$ ), membrane selectivity ( $\alpha$ ), and pervaporation separation index (PSI)) for the PPO and BCP-based membranes in pervaporation dehydration of ethanol (4.4-70 wt.% water) at 22°C.

| Transport<br>t | Membrane |     | BCP                       | BCP                       | BCP                       |
|----------------|----------|-----|---------------------------|---------------------------|---------------------------|
|                | Water    | PPO | (PDMS:PPO:TDI<br>26:73:1) | (PDMS:PPO:TDI<br>41:58:1) | (PDMS:PPO:TDI<br>51:48:1) |

|     | <div>content<br/>in feed, wt.%</div> |                  |     |     |     |
|-----|--------------------------------------|------------------|-----|-----|-----|
| PSI | 4.4                                  | $5.1 \cdot 10^9$ | 2.4 | 2.8 | 2.4 |
|     | 10                                   | 83.6             | 1.4 | 1.4 | 0.9 |
|     | 30                                   | 6.1              | 0.5 | 0.6 | 0.4 |
|     | 50                                   | 29.6             | 0.4 | 0.4 | 0.2 |
|     | 70                                   | 1.8              | 1.3 | 0.6 | 0.3 |

**Table S2.** Transport parameters (permeation flux, water content in the permeate, component (water and ethanol) permeability, separation factor ( $\beta$ ), membrane selectivity ( $\alpha$ ), and pervaporation separation index (PSI)) for BCP (PDMS:PPO:TDI = 41:58:1 wt.%) and BCP/GO membranes in pervaporation dehydration of ethanol (4.4-70 wt.% water) at 22°C.

| Transport parameter                    | Membrane                     | BCP   | BCP/GO (0.3%) | BCP/GO (0.5%) | BCP/GO (0.7%) | BCP/GO (0.9%) |
|----------------------------------------|------------------------------|-------|---------------|---------------|---------------|---------------|
|                                        | Water content in feed, wt. % |       |               |               |               |               |
| Permeation flux, kg/(m <sup>2</sup> h) | 4.4                          | 0.045 | 0.054         | 0.065         | 0.078         | 0.069         |
|                                        | 10                           | 0.046 | 0.054         | 0.066         | 0.079         | 0.070         |
|                                        | 30                           | 0.050 | 0.055         | 0.065         | 0.079         | 0.070         |
|                                        | 50                           | 0.058 | 0.059         | 0.066         | 0.080         | 0.074         |
|                                        | 70                           | 0.059 | 0.060         | 0.070         | 0.087         | 0.077         |
| Water content in permeate, wt. %       | 4.4                          | 74.6  | 74.5          | 75.3          | 76.8          | 69.9          |
|                                        | 10                           | 77.6  | 77.6          | 77.9          | 79.9          | 71.9          |
|                                        | 30                           | 85.1  | 85.4          | 86.4          | 86.9          | 80.0          |
|                                        | 50                           | 89.7  | 88.7          | 90.0          | 94.5          | 84.7          |
|                                        | 70                           | 96.4  | 96.2          | 97.9          | 98.8          | 94.4          |
| Water permeability, Barrer             | 4.4                          | 78639 | 93082         | 113302        | 140503        | 112798        |
|                                        | 10                           | 40448 | 48193         | 58689         | 72471         | 57260         |
|                                        | 30                           | 22006 | 24122         | 28958         | 35396         | 28493         |
|                                        | 50                           | 21167 | 21271         | 24331         | 30922         | 25366         |
|                                        | 70                           | 22286 | 22829         | 27199         | 33880         | 28566         |
| Ethanol permeability, Barrer           | 4.4                          | 1217  | 1453          | 1690          | 1909          | 2209          |
|                                        | 10                           | 1250  | 1491          | 1782          | 1944          | 2394          |
|                                        | 30                           | 1651  | 1770          | 1956          | 2275          | 3042          |
|                                        | 50                           | 2428  | 2704          | 2689          | 1810          | 4569          |
|                                        | 70                           | 1932  | 2099          | 1371          | 990           | 3915          |

**Continuation of Table S2.** Transport parameters (permeation flux, water content in the permeate, component (water and ethanol) permeability, separation factor ( $\beta$ ), membrane selectivity ( $\alpha$ ), and pervaporation separation index (PSI)) for BCP (PDMS:PPO:TDI = 41:58:1 wt.%) and BCP/GO membranes in pervaporation dehydration of ethanol (4.4-70 wt.% water) at 22°C.

| Transport parameter                  | Membrane<br>Water content<br>in feed, wt.% | BCP | BCP/GO<br>(0.3%) | BCP/GO<br>(0.5%) | BCP/GO<br>(0.7%) | BCP/GO<br>(0.9%) |
|--------------------------------------|--------------------------------------------|-----|------------------|------------------|------------------|------------------|
| Separation factor<br>( $\beta$ )     | 4.4                                        | 64  | 63               | 66               | 72               | 50               |
|                                      | 10                                         | 31  | 31               | 32               | 36               | 23               |
|                                      | 30                                         | 13  | 14               | 15               | 16               | 9                |
|                                      | 50                                         | 9   | 8                | 9                | 17               | 6                |
|                                      | 70                                         | 12  | 11               | 20               | 34               | 7                |
| Membrane selectivity<br>( $\alpha$ ) | 4.4                                        | 65  | 64               | 67               | 74               | 51               |
|                                      | 10                                         | 32  | 32               | 33               | 37               | 24               |
|                                      | 30                                         | 13  | 14               | 15               | 16               | 9                |
|                                      | 50                                         | 9   | 8                | 9                | 17               | 6                |
|                                      | 70                                         | 12  | 11               | 20               | 34               | 7                |
| PSI                                  | 4.4                                        | 2.8 | 3.3              | 4.2              | 5.5              | 3.4              |
|                                      | 10                                         | 1.4 | 1.6              | 2.0              | 2.7              | 1.5              |
|                                      | 30                                         | 0.6 | 0.7              | 0.9              | 1.2              | 0.6              |
|                                      | 50                                         | 0.4 | 0.4              | 0.5              | 1.3              | 0.3              |
|                                      | 70                                         | 0.6 | 0.6              | 1.3              | 2.9              | 0.5              |
